# Supplementary material for: Neuron-Glial Antigen 2 Participates in Liver Fibrosis via Regulating the Differentiation of Bone Marrow Mesenchymal Stem Cell to Myofibroblast
Source: MDPI journal article supplement (doi:10.3390/ijms24021177), 2023-01-07
Supplement: s1 [file s1]

**Supplementary Table S1. The patients' information**

|    | Sex    | Age | Etiology of the disease | Stage |
|----|--------|-----|-------------------------|-------|
| 1  | male   | 48  | HBV                     | F2F3  |
| 2  | female | 72  | autoimmune              | F2    |
| 3  | male   | 58  | HBV                     | F4    |
| 4  | male   | 51  | HBV                     | F3F4  |
| 5  | female | 58  | HCV                     | F2F3  |
| 6  | female | 50  | HBV                     | F2F3  |
| 7  | female | 70  | HBV                     | F3F4  |
| 8  | female | 59  | autoimmune              | F3F4  |
| 9  | male   | 29  | HBV                     | F3F4  |
| 10 | male   | 52  | cholestatic             | F2F3  |
| 11 | male   | 70  | drug-induced            | F2F3  |
| 12 | female | 62  | autoimmune              | F2F3  |
| 13 | female | 64  | HCV                     | F2F3  |
| 14 | female | 68  | cryptogenic             | F3F4  |
| 15 | male   | 42  | HBV                     | F2F3  |
| 16 | male   | 57  | alcoholic               | F2F3  |
| 17 | female | 67  | cryptogenic             | F2F3  |
| 18 | male   | 51  | HCV                     | F2    |
| 19 | female | 48  | cryptogenic             | F3F4  |
| 20 | male   | 62  | HCV                     | F2F3  |
| 21 | male   | 68  | HBV                     | F4    |
| 22 | female | 68  | cryptogenic             | F3    |
| 23 | female | 49  | hepatic hemangioma      |       |
| 24 | female | 41  | hepatic hemangioma      |       |
| 25 | male   | 29  | hepatic hemangioma      |       |
| 26 | female | 59  | hepatic hemangioma      |       |
| 27 | male   | 49  | hepatic hemangioma      |       |
| 28 | male   | 54  | hepatic hemangioma      |       |

The patients' information includes sex, age, etiology of the disease and stage. Human fibrotic samples (fibrosis stage: F2-4) were obtained from livers of 22 patients undergoing liver biopsy (11 men, 11 women; mean age, 58 years; range, 29-72 years). Fibrosis was consecutive to chronic HBV (n=8), HCV (n=4), alcoholic (n=1), cryptogenic (n=4), cholestatic (n=1), drug-induced (n=1), and autoimmune (n=3) liver disease. Normal liver samples were collected from 6 patients undergoing hepatic resection for hepatic hemangioma. All subjects gave their informed consent for inclusion before they participated in the study. Written informed consent has been obtained from the patient(s) to publish this paper. The study was conducted in accordance with the Declaration of Helsinki, and the protocol was approved by the Ethics Committee of Beijing Shijitan Hospital, Capital Medical University, Beijing, China (project identification code: 2018EC-1).
